# Supplementary material for: The role of attention in human motor resonance
Source: PLoS One. 2017 May 16;12(5):e0177457. doi: 10.1371/journal.pone.0177457 (PMC5433684; doi:10.1371/journal.pone.0177457)
Supplement: S1 Table — (XLSX) [file pone.0177457.s002.xlsx]

## Sheet: reflex modulation; circ-linear
Explicit observation				Implicit observation				Semi-implicit observation				Baseline observation				circular-linear corrlation anSubj28ysis: Single subject's R coefficients										circular-linear corrlation anSubj28ysis: single subject's R coefficient after Fisher transformation
subjects	Angular position	Reflex Amplitude		subjects	Angular position	Reflex Amplitude		subjects	Angular position	Reflex Amplitude		subjects	Angular position	Reflex Amplitude		Explicit Observation		Implicit Observation		Semi-implicit observation		Baseline Observation				Explicit Observation		Implicit Observation		Semi-implicit observation		Baseline Observation
Subj1	6.11	-39.8		Subj15	0.19	-12.2		Subj29	0	0.2		Subj43	6.1039	1.05		Subjects	R-coefficient	Subjects	R-coefficient	Subjects	R-coefficient	Subjects	R-coefficient			Subjects	Fisher_R-coefficient	Subjects	Fisher_R-coefficient	Subjects	Fisher_R-coefficient	Subjects	Fisher_R-coefficient
	1.07409	-24.6			1.52207	-4.1			1.29854	-14.9			1.10916	3.35		explicit_Subj4R	0.882199	countlight_Subj28R	0.991266	updown_Subj42R	0.974204	control_Subj53R	0.651833			explicit_Subj4R_Fish	1.3856	countlight_Subj28R_Fish	2.71464	updown_Subj42R_Fish	2.16884	control_Subj53R_Fish	0.778479
	2.31819	28.8			2.85415	2.75			2.59707	-12.4			2.39441	-11.7		explicit_Subj8R	0.897368	countlight_Subj20R	0.948219	updown_Subj32R	0.874542	control_Subj52R	0.688411			explicit_Subj8R_Fish	1.45854	countlight_Subj20R_Fish	1.81383	updown_Subj32R_Fish	1.35207	control_Subj52R_Fish	0.844929
	3.56228	69.8667			4.18622	6.25			3.89561	14			3.67967	1.95		explicit_Subj2R	0.967134	countlight_Subj21R	0.73763	updown_Subj39R	0.993025	control_Subj48R	0.859436			explicit_Subj2R_Fish	2.04595	countlight_Subj21R_Fish	0.94526	updown_Subj39R_Fish	2.82751	control_Subj48R_Fish	1.29118
	4.80638	-36.7333			5.5183	5.15			5.19414	11.05			4.96493	3.55		explicit_Subj6R	0.922533	countlight_Subj16R	0.900752	updown_Subj37R	0.877336	control_Subj49R	0.0285309			explicit_Subj6R_Fish	1.60577	countlight_Subj16R_Fish	1.47619	updown_Subj37R_Fish	1.36408	control_Subj49R_Fish	0.0285386
Subj2	0.18	-30.6		Subj16	0	-8.95		Subj30	0.2193	-11.15		Subj44	0	-4.55		explicit_Subj11R	0.907889	countlight_Subj23R	0.652735	updown_Subj41R	0.736767	control_Subj45R	0.165342			explicit_Subj11R_Fish	1.51538	countlight_Subj23R_Fish	0.78005	updown_Subj41R_Fish	0.943371	control_Subj45R_Fish	0.166874
	1.45264	-43.5			1.22193	18.3			1.47858	-22			1.22961	-3.95		explicit_Subj1R	0.911836	countlight_Subj15R	0.854504	updown_Subj40R	0.491643	control_Subj50R	0.298309			explicit_Subj1R_Fish	1.53831	countlight_Subj15R_Fish	1.27261	updown_Subj40R_Fish	0.538225	control_Subj50R_Fish	0.307662
	2.72529	23.6			2.44386	12.35			2.73786	-1.5			2.45923	21.9		explicit_Subj14R	0.924963	countlight_Subj22R	0.970776	updown_Subj35R	0.792276	control_Subj54R	0.179996			explicit_Subj14R_Fish	1.62234	countlight_Subj22R_Fish	2.10559	updown_Subj35R_Fish	1.07751	control_Subj54R_Fish	0.181978
	3.99793	32.75			3.66578	-14			3.99714	23.8			3.68884	-24.85		explicit_Subj5R	0.968925	countlight_Subj24R	0.983575	updown_Subj38R	0.684862	control_Subj47R	0.900611			explicit_Subj5R_Fish	2.07442	countlight_Subj24R_Fish	2.39693	updown_Subj38R_Fish	0.838215	control_Subj47R_Fish	1.47545
	5.27058	15.75			4.88771	-9.6			5.25642	8.55			4.91846	9.5		explicit_Subj3R	0.984618	countlight_Subj25R	0.641041	updown_Subj34R	0.929378	control_Subj43R	0.617211			explicit_Subj3R_Fish	2.42999	countlight_Subj25R_Fish	0.759939	updown_Subj34R_Fish	1.65381	control_Subj43R_Fish	0.720487
Subj3	0	-18.35		Subj17	0	-3.65		Subj31	0	-1.22222		Subj45	6.0356	9.9		explicit_Subj12R	0.974906	countlight_Subj27R	0.968645	updown_Subj29R	0.975598	control_Subj51R	0.685299			explicit_Subj12R_Fish	2.18282	countlight_Subj27R_Fish	2.06987	updown_Subj29R_Fish	2.19699	control_Subj51R_Fish	0.839038
	1.19498	-70.75			1.27462	-12.45			1.29878	-10.4444			1.04923	-10.65		explicit_Subj7R	0.960767	countlight_Subj18R	0.939279	updown_Subj36R	0.762291	control_Subj55R	0.935895			explicit_Subj7R_Fish	1.95579	countlight_Subj18R_Fish	1.73189	updown_Subj36R_Fish	1.00166	control_Subj55R_Fish	1.7039
	2.38997	-9.1			2.54925	7			2.59756	-5.33333			2.34287	3.1		explicit_Subj10R	0.723745	countlight_Subj17R	0.838531	updown_Subj30R	0.987451	control_Subj44R	0.308322			explicit_Subj10R_Fish	0.915465	countlight_Subj17R_Fish	1.21621	updown_Subj30R_Fish	2.53248	control_Subj44R_Fish	0.31869
	3.58495	51.8			3.82387	14.45			3.89634	14.4444			3.6365	1.15		explicit_Subj13R	0.947544	countlight_Subj26R	0.592584	updown_Subj31R	0.855263	control_Subj46R	0.247993			explicit_Subj13R_Fish	1.80717	countlight_Subj26R_Fish	0.681639	updown_Subj31R_Fish	1.27543	control_Subj46R_Fish	0.253273
	4.77994	44.8			5.09849	-7.4			5.19512	-0.333333			4.93013	-6		explicit_Subj9R	0.75113	countlight_Subj19R	0.989388	updown_Subj33R	0.677819	control_Subj56R	0.926425			explicit_Subj9R_Fish	0.975544	countlight_Subj19R_Fish	2.61681	updown_Subj33R_Fish	0.825069	control_Subj56R_Fish	1.63256
Subj4	0.23	-43		Subj18	0.259	22.45		Subj32	0	-6.55		Subj46	0.1664	-3.2
	1.51792	-4.05556			1.48482	7.95			1.27038	-4.85			1.36236	-13.35			0.908968		0.85778		0.829461		0.535258				1.67951		1.61296		1.47109		0.753074
	2.80585	111.722			2.71063	-1.85			2.54075	29.4			2.55832	2.15
	4.09377	-16.2222			3.93645	-27.55			3.81113	9			3.75427	8.05
	5.3817	-50.1667			5.16227	-2.95			5.0815	-29.05			4.95023	4.5
Subj5	0.05	10.2105		Subj19	0	2.4		Subj33	0	30.6		Subj47	0.3362	-1.5
	1.31573	-99.8421			1.24186	-17.15			1.15792	16.1			1.55126	1.9
	2.58146	-26.3684			2.48371	-8.6			2.31584	-36.85			2.76633	13.9
	3.84719	39.5789			3.72557	6.55			3.47377	6			3.98139	1.4
	5.11292	74.6316			4.96743	15			4.63169	-17.7			5.19646	-17.5
Subj6	0.0466	-58.8		Subj20	0	-17.05		Subj34	0	4.05		Subj48	0.1437	23.75
	1.29273	-13.75			1.25592	-4.9			1.26308	-20.2			1.39412	6.45
	2.53885	30.45			2.51183	4.75			2.52616	-18			2.64455	8.3
	3.78498	82.3			3.76775	11.2			3.78924	20.7			3.89497	-29.2
	5.03111	-42.25			5.02367	3.35			5.05232	11.75			5.1454	-10.7
Subj7	0.1488	-1.3		Subj21	0.3677	9.8		Subj35	0	0.631579		Subj49	0.3089	-16.55
	1.40269	-9.6			1.63868	-9.7			1.25928	-7.10526			1.55808	12.2
	2.65659	-0.65			2.90967	-12.75			2.51856	-8.63158			2.80726	-5.2
	3.91048	6.15			4.18065	10.35			3.77784	12.1053			4.05643	-5.85
	5.16438	3.85			5.45163	0.3			5.03712	1.42105			5.30561	13.5
Subj8	0.31	-59.35		Subj22	0	-15.6		Subj36	6.1226	-7.35		Subj50	0.2356	6.9
	1.55133	-70			1.19001	-38.8			1.1355	-28.25			1.54022	-3.75
	2.79266	-17.75			2.38003	-26.55			2.42839	17.6			2.84485	0.65
	4.03398	143.8			3.57004	9.8			3.72129	5.45			4.14947	-1.2
	5.27531	1.55			4.76005	49.3			5.01419	10.25			5.45409	-4.75
Subj9	6.1494	-9.57		Subj23	0.3189	3.85		Subj37	0	-5.45		Subj51	0.525	-19.1
	1.12553	-1.17			1.4915	-16			1.29214	-13.35			1.80931	-6.25
	2.38165	-8.72			2.6641	-4.6			2.58429	10.4			3.09363	1.95
	3.63778	8.63			3.8367	17.95			3.87643	7.85			4.37794	17.25
	4.89391	10.83			5.0093	-2.95			5.16857	-2.2			5.66225	3.15
Subj10	5.50323	-26.3333		Subj24	6.2118	-3.85		Subj38	0	1.45		Subj52	0.2815	12.75
	0.478913	1.46667			1.19143	-7.5			1.20402	13.2			1.53592	-19.7
	1.73463	2.13333			2.45106	0.45			2.40805	-21.4			2.79034	-1.3
	2.99034	62.5333			3.7107	4.55			3.61207	-39.05			4.04476	1.05
	4.24605	-41.9333			4.97033	4.1			4.81609	43.7			5.29918	4.9
Subj11	5.82513	15.0667		Subj25	0	-24.35		Subj39	0	11.95		Subj53	0.33	-18.1
	0.789934	-74.3333			1.29181	1.75			1.29115	-31.75			1.45279	-26.35
	2.03477	-15.2667			2.58362	9.35			2.5823	-35.8			2.57558	22.2
	3.2796	43.1333			3.87543	1.25			3.87345	7.45			3.69838	-7.2
	4.52444	29.3333			5.16724	10			5.16459	46.2			4.82117	28
Subj12	6.1201	-16.7333		Subj26	0	-15.5		Subj40	6.156	-20.8421		Subj54	0	15
	1.07789	-30.0667			1.23367	0.6			1.1602	20.2632			1.1637	26.8
	2.31568	-13.8			2.46734	2.15			2.4444	2.78947			2.32739	-57.8
	3.55346	20.6			3.70102	0.85			3.7286	-9.26316			3.49109	45.65
	4.79125	37.6			4.93469	10.15			5.0128	4.78947			4.65478	-31.65
Subj13	0.1051	-5.4		Subj27	0.2231	-24.2		Subj41	0.2818	-23.25		Subj55	0	-0.35
	1.36149	-90.9333			1.49968	-9.75			1.56847	-4.8			1.15201	1.05
	2.61789	-0.133333			2.77627	11.15			2.85514	-13.55			2.30402	-3.1
	3.87428	48.6			4.05285	16.55			4.14181	46.85			3.45602	6.1
	5.13067	46.2667			5.32943	4.5			5.42848	-6.95			4.60803	-5.65
Subj14	0.2956	-56.1		Subj28	0	11.95		Subj42	0	-32.25		Subj56	0	0.35
	1.48406	-39.5			1.30783	-31.75			1.26309	-25.15			1.2634	-3.7
	2.67251	60.75			2.61566	-35.8			2.52618	0.45			2.52681	2.6
	3.86097	86.55			3.92349	7.45			3.78927	44.45			3.79021	4.6
	5.04942	-53.45			5.23132	46.2			5.05236	10.7			5.05361	-6.15
explicitR	0.6403				countlightR	0.3987			updownR	0.423			controlR	0.0714
explicitP	0.0058686				countlightP	0.0038			updownP	0.0019			controlP	0.8365
