# Supplementary material for: The role of attention in human motor resonance
Source: PLoS One. 2017 May 16;12(5):e0177457. doi: 10.1371/journal.pone.0177457 (PMC5433684; doi:10.1371/journal.pone.0177457)
Supplement: S2 Table — (XLSX) [file pone.0177457.s003.xlsx]

## Sheet: Phase differences analysis
explicit	semi-implicit	implicit
1	-168	-114
14	-87	-42
16	-64	-26
24	-25	-4
24	0	3
29	0	16
33	11	37
36	24	41
42	25	56
87	37	62
87	50	68
88	52	69
115	65	82
138	124	175
