# Supplementary material for: The role of attention in human motor resonance
Source: PLoS One. 2017 May 16;12(5):e0177457. doi: 10.1371/journal.pone.0177457 (PMC5433684; doi:10.1371/journal.pone.0177457)
Supplement: S3 Table — (XLSX) [file pone.0177457.s004.xlsx]

## Sheet: Amplitude
55.5	explicit
42.2	explicit
60.9	explicit
71.8	explicit
82.1	explicit
67	explicit
14.7	explicit
96.6	explicit
9	explicit
36.5	explicit
53.4	explicit
67.8	explicit
34.7	explicit
81	explicit
37.9	semi-implicit
25.8	semi-implicit
9.6	semi-implicit
42.3	semi-implicit
28.3	semi-implicit
10.9	semi-implicit
17.7	semi-implicit
8.3	semi-implicit
21.3	semi-implicit
23	semi-implicit
23.6	semi-implicit
10.3	semi-implicit
22.1	semi-implicit
16.4	semi-implicit
8.6	implicit
16.6	implicit
11.7	implicit
21.5	implicit
15.8	implicit
13	implicit
9.9	implicit
50.8	implicit
9.9	implicit
6.5	implicit
11.3	implicit
6.9	implicit
20.4	implicit
42.1	implicit
5.463	baseline
1e-05	baseline
1.659	baseline
3.462	baseline
9.14	baseline
11.82	baseline
0.4683	baseline
1e-06	baseline
1e-05	baseline
1e-06	baseline
9.25	baseline
7.9047	baseline
1.7343	baseline
3.457	baseline
